# Supplementary material for: Longitudinal Analysis of Neuraminidase and Hemagglutinin Antibodies to Influenza A Viruses after Immunization with Seasonal Inactivated Influenza Vaccines
Source: MDPI journal article supplement (doi:10.3390/vaccines11111731), 2023-11-20
Supplement: s1 [file s1]

### ***Supplementary Material***

**Supplementary Table S1.** Average level of NI and HI antibodies throughout a year after vaccination with split and subunit adjuvanted influenza vaccines (GMT, 95%CI)

| Antigen      | H1             |                       | H3             |                       | N1           |                       | N2           |                       |
|--------------|----------------|-----------------------|----------------|-----------------------|--------------|-----------------------|--------------|-----------------------|
| Vaccine type | split          | subunit<br>adjuvanted | split          | subunit<br>adjuvanted | split        | subunit<br>adjuvanted | split        | subunit<br>adjuvanted |
| day 0        | 42 (24 – 73)   | 27 (18 – 40)          | 19 (13 – 30)   | 19 (13 – 29)          | 14 (9-21)    | 11 (8-15)             | 10 (6-16)    | 14 (10-20)            |
| day 7        | 152 (103-224)  | 94 ( 65-136 )         | 84 ( 50-142 )  | 49 ( 33-73 )          | 36 ( 24-55 ) | 20 ( 14-28 )          | 25 ( 15-40 ) | 26 ( 17-39 )          |
| day 21       | 187 (129-269)  | 170 (109-265)         | 130 ( 79-216 ) | 98 ( 66-146 )         | 42 ( 26-67 ) | 22 ( 15-33 )          | 28 ( 16-46 ) | 28 ( 18-42 )          |
| month 3      | 115 ( 79-167 ) | 117 ( 79-172 )        | 89 ( 59-134 )  | 61 ( 41-91 )          | 26 ( 16-42 ) | 21 ( 14-30 )          | 53 ( 36-79 ) | 50 ( 34-73 )          |
| month 6      | 70 ( 49-101 )  | 79 ( 54-116 )         | 65 ( 43-98 )   | 54 ( 37-80 )          | 19 ( 12-29 ) | 19 ( 13-26 )          | 41 ( 27-62 ) | 38 ( 25-57 )          |
| month 12     | 47 ( 32-68 )   | 54 ( 37-77 )          | 46 ( 31-68 )   | 39 ( 26-58 )          | 13 ( 8-22 )  | 11 ( 8-15 )           | 28 ( 18-45 ) | 30 ( 19-45 )          |

**Supplementary Table S2.** Statistical analysis results of within group antibody titer comparison in dependence of time point

|                    | H1        |         |                  | H3        |         |                  | N1        |         |                  | N2        |         |                  |
|--------------------|-----------|---------|------------------|-----------|---------|------------------|-----------|---------|------------------|-----------|---------|------------------|
|                    | Mean Diff | Summary | Adjusted P Value | Mean Diff | Summary | Adjusted P Value | Mean Diff | Summary | Adjusted P Value | Mean Diff | Summary | Adjusted P Value |
| split              |           |         |                  |           |         |                  |           |         |                  |           |         |                  |
| d0 vs. d7          | -0.54     | **      | 0.003            | -0.61     | ***     | 0.0008           | -0.42     | ****    | <0,0001          | -0.39     | ***     | 0.0007           |
| d0 vs. d21         | -0.64     | **      | 0.0013           | -0.80     | ****    | <0,0001          | -0.48     | ****    | <0,0001          | -0.44     | ***     | 0.0004           |
| d0 vs. m3          | -0.43     | *       | 0.0178           | -0.63     | ****    | <0,0001          | -0.27     | ns      | 0.0763           | -0.72     | ****    | <0,0001          |
| d0 vs. m6          | -0.22     | ns      | 0.5619           | -0.50     | ***     | 0.0009           | -0.13     | ns      | 0.9625           | -0.61     | ****    | <0,0001          |
| d0 vs. m12         | -0.03     | ns      | >0,9999          | -0.36     | *       | 0.0304           | 0.02      | ns      | >0,9999          | -0.45     | ****    | <0,0001          |
| d7 vs. d21         | -0.09     | ns      | 0.1226           | -0.19     | *       | 0.0259           | -0.07     | ns      | 0.9855           | -0.05     | ns      | >0,9999          |
| d7 vs. m3          | 0.12      | ns      | 0.1356           | -0.01     | ns      | >0,9999          | 0.14      | ns      | 0.8374           | -0.33     | **      | 0.0061           |
| d7 vs. m6          | 0.33      | ***     | 0.0003           | 0.12      | ns      | 0.8858           | 0.29      | *       | 0.0214           | -0.22     | ns      | 0.2761           |
| d7 vs. m12         | 0.51      | ****    | <0,0001          | 0.25      | ns      | 0.2476           | 0.44      | **      | 0.0075           | -0.05     | ns      | >0,9999          |
| d21 vs. m3         | 0.21      | ***     | 0.0004           | 0.17      | **      | 0.0047           | 0.21      | ns      | 0.1403           | -0.28     | ns      | 0.0549           |
| d21 vs. m6         | 0.42      | ****    | <0,0001          | 0.30      | **      | 0.0014           | 0.36      | **      | 0.006            | -0.17     | ns      | 0.4668           |
| d21 vs. m12        | 0.60      | ****    | <0,0001          | 0.44      | ***     | 0.0001           | 0.51      | **      | 0.0025           | 0.00      | ns      | >0,9999          |
| m3 vs. m6          | 0.21      | ****    | <0,0001          | 0.13      | ns      | 0.073            | 0.15      | ns      | 0.2903           | 0.12      | ns      | 0.4554           |
| m3 vs. m12         | 0.40      | ****    | <0,0001          | 0.27      | **      | 0.0011           | 0.30      | ns      | 0.2182           | 0.28      | **      | 0.0026           |
| m6 vs. m12         | 0.19      | ****    | <0,0001          | 0.14      | ns      | 0.0698           | 0.15      | ns      | 0.9767           | 0.16      | **      | 0.0012           |
| Subunit adjuvanted |           |         |                  |           |         |                  |           |         |                  |           |         |                  |
| d0 vs. d7          | -0.55     | ****    | <0,0001          | -0.42     | ***     | 0.0004           | -0.26     | **      | 0.0014           | -0.27     | **      | 0.0086           |
| d0 vs. d21         | -0.80     | ****    | <0,0001          | -0.70     | ****    | <0,0001          | -0.31     | ***     | 0.0009           | -0.30     | ***     | 0.001            |
| d0 vs. m3          | -0.64     | ****    | <0,0001          | -0.49     | ****    | <0,0001          | -0.26     | **      | 0.0033           | -0.55     | ****    | <0,0001          |
| d0 vs. m6          | -0.47     | ***     | 0.0001           | -0.44     | ***     | 0.0006           | -0.24     | **      | 0.0027           | -0.43     | ****    | <0,0001          |
| d0 vs. m12         | -0.29     | *       | 0.0394           | -0.31     | ns      | 0.0658           | 0.03      | ns      | >0,9999          | -0.33     | ***     | 0.0002           |
| d7 vs. d21         | -0.25     | **      | 0.0098           | -0.28     | **      | 0.0017           | -0.06     | ns      | 0.9876           | -0.03     | ns      | >0,9999          |
| d7 vs. m3          | -0.08     | ns      | 0.9857           | -0.08     | ns      | 0.9829           | -0.01     | ns      | >0,9999          | -0.29     | **      | 0.0027           |
| d7 vs. m6          | 0.08      | ns      | 0.9898           | -0.03     | ns      | >0,9999          | 0.02      | ns      | >0,9999          | -0.17     | ns      | 0.4139           |
| d7 vs. m12         | 0.26      | **      | 0.0092           | 0.11      | ns      | 0.9733           | 0.28      | *       | 0.0141           | -0.06     | ns      | 0.9998           |
| d21 vs. m3         | 0.17      | **      | 0.0015           | 0.21      | ****    | <0,0001          | 0.05      | ns      | 0.9994           | -0.25     | **      | 0.001            |
| d21 vs. m6         | 0.33      | ****    | <0,0001          | 0.25      | ****    | <0,0001          | 0.08      | ns      | 0.9885           | -0.13     | ns      | 0.6451           |
| d21 vs. m12        | 0.51      | ****    | <0,0001          | 0.39      | ****    | <0,0001          | 0.34      | **      | 0.002            | -0.03     | ns      | >0,9999          |
| m3 vs. m6          | 0.16      | ***     | 0.0002           | 0.05      | ns      | 0.9938           | 0.03      | ns      | >0,9999          | 0.12      | ns      | 0.1782           |
| m3 vs. m12         | 0.34      | ****    | <0,0001          | 0.19      | *       | 0.0454           | 0.29      | ***     | 0.0005           | 0.22      | **      | 0.0084           |
| m6 vs. m12         | 0.18      | ****    | <0,0001          | 0.14      | ***     | 0.0007           | 0.26      | ***     | 0.0001           | 0.10      | ns      | 0.3803           |

Analyses was performed by two-way repeated measures ANOVA or mixed-effect model in case of missing values as implemented in GraphPad Prism v. 8.4.3. Presented mean difference and p-value are results of within group comparison of logarithmic titers at indicated time points.

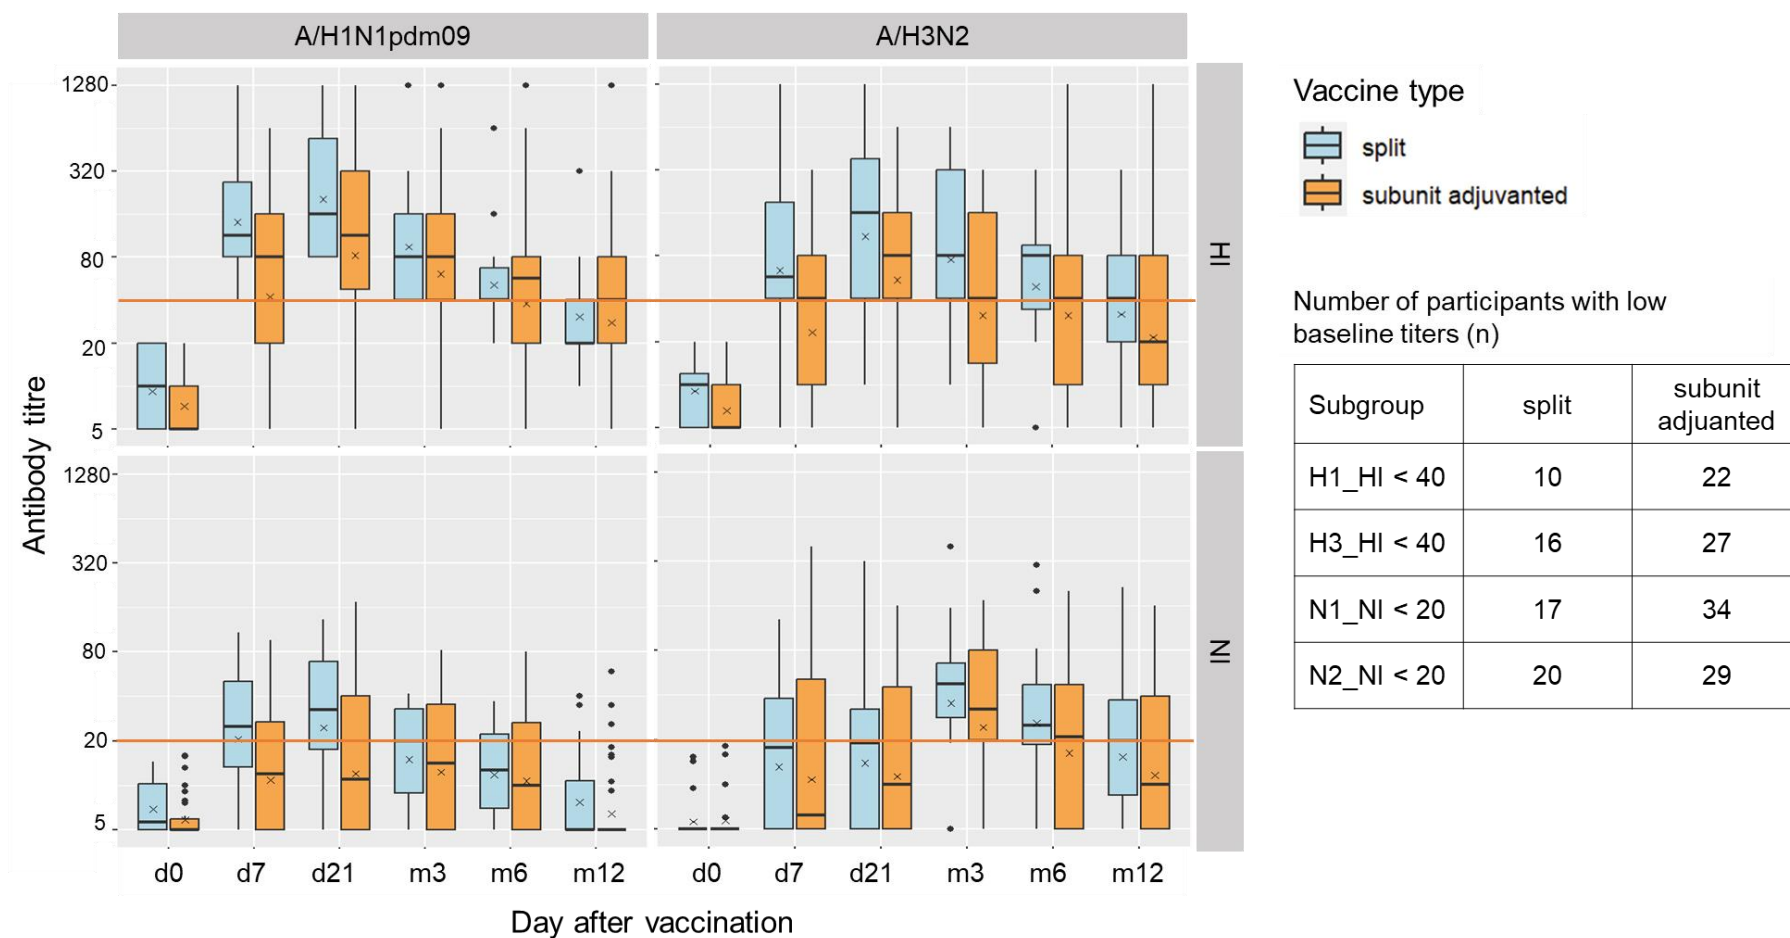

**Supplementary Figure S1.** Antibody dynamics throughout one year after vaccination in the subgroups of participants with low baseline antibody titers. Data is represented by box-plot diagram with a solid black line at median titer and a cross at geometric mean titer (GMT). Red lines indicate conventional antibody level threshold adopted in this study: 1:40 for HI antibodies and 1:20 for NI antibodies. Number of participants included in each subgroup are presented in the table on the right.

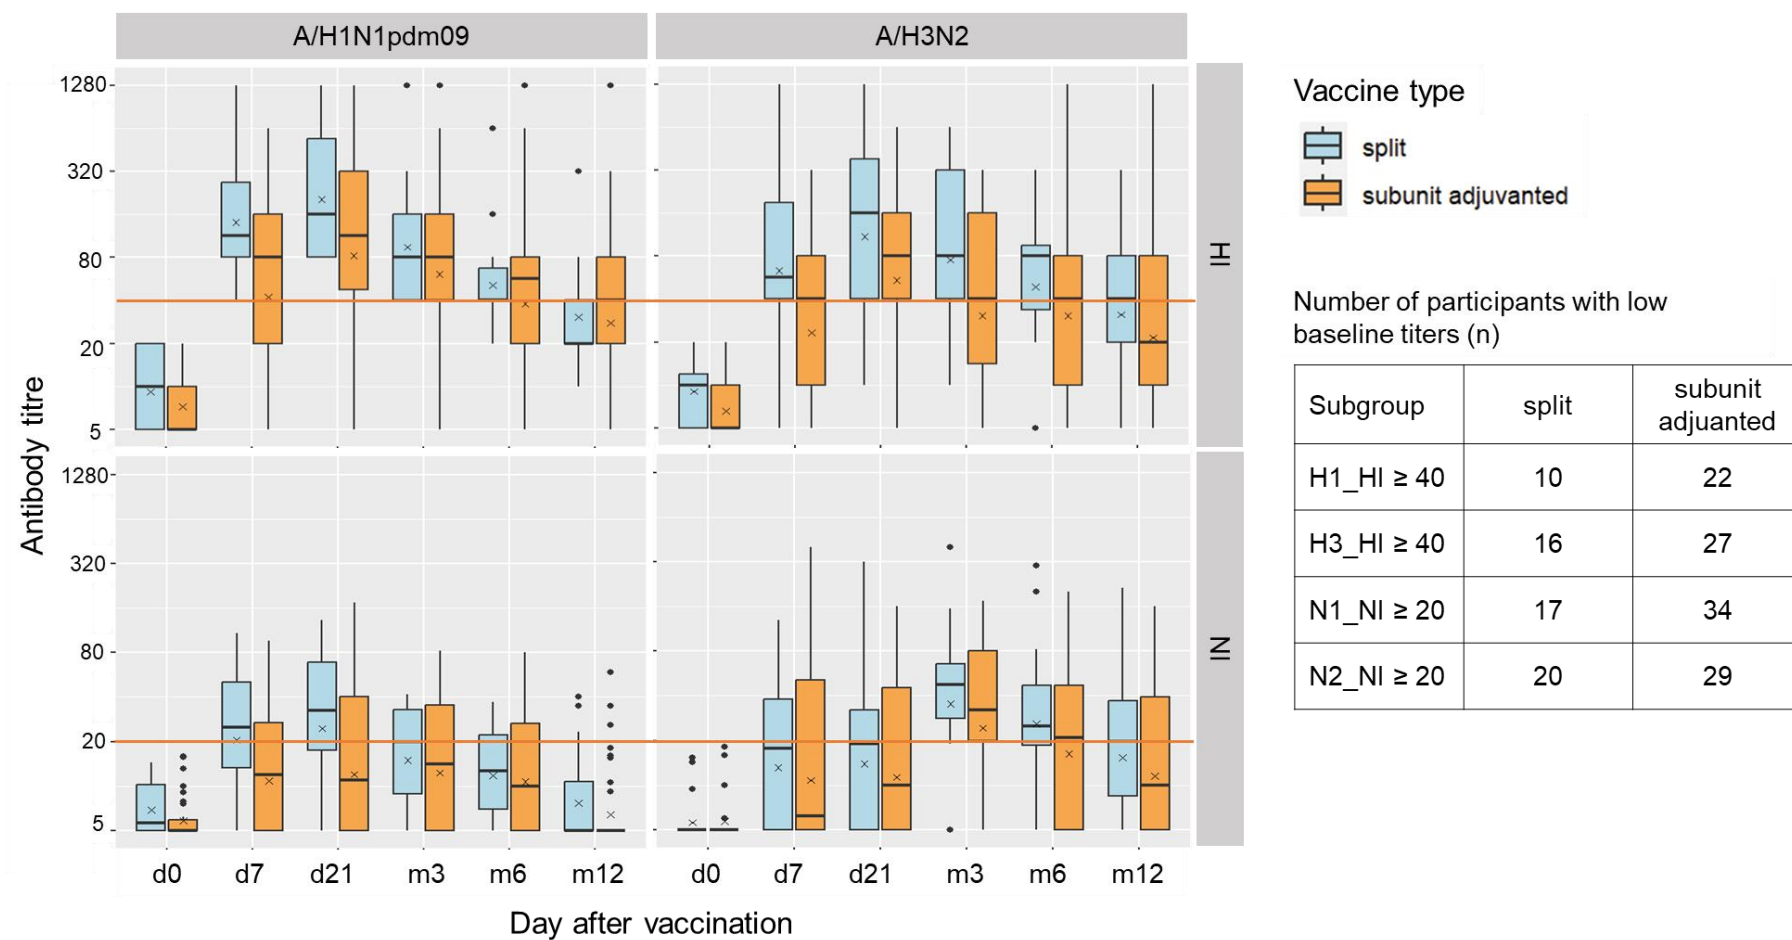

**Supplementary Figure S2.** Antibody dynamics throughout one year after vaccination in the subgroups of participants with high baseline antibody titers. Data is represented by box-plot diagram with a solid black line at median titer and a cross at geometric mean titer (GMT). Red lines indicate conventional antibody level threshold adopted in this study: 1:40 for HI antibodies and 1:20 for NI antibodies. Number of participants included in each subgroup are presented in the table on the right.

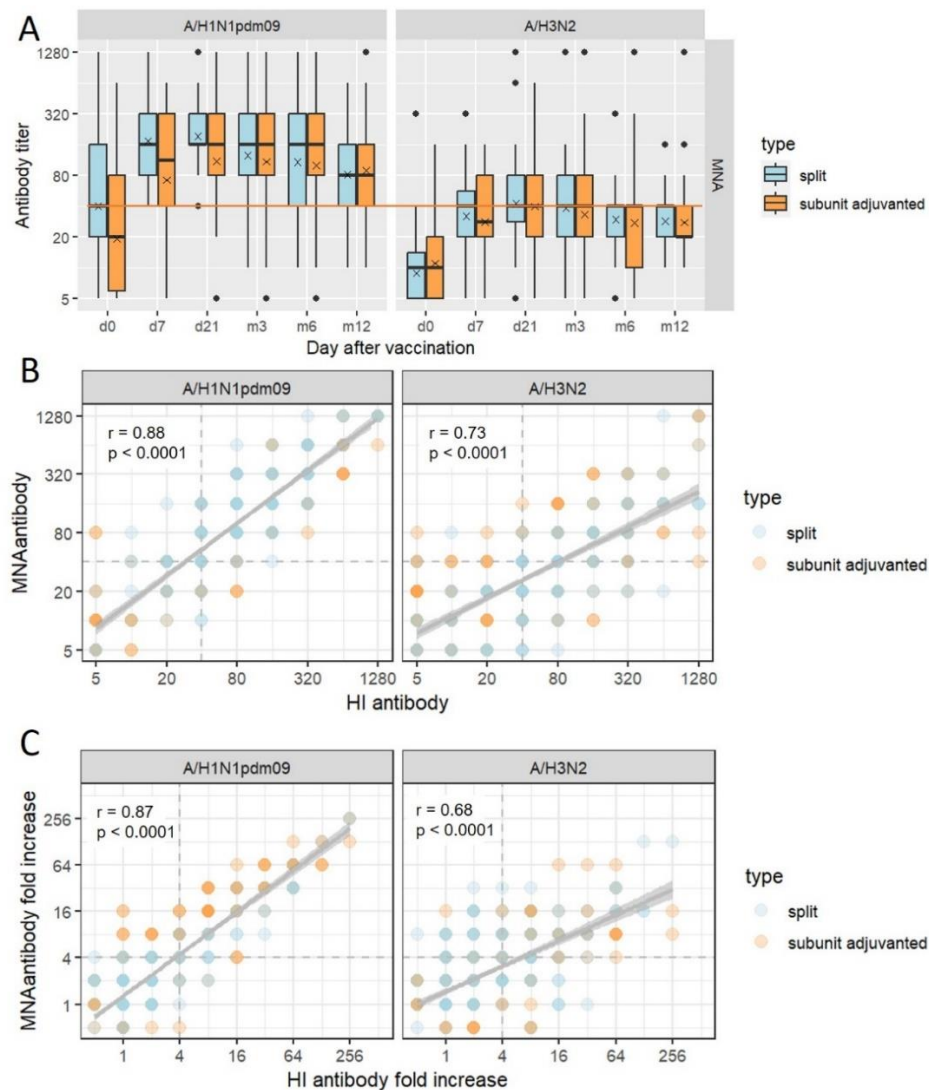

**Supplementary Figure S3.** Neutralizing antibody dynamics and correlation with hemagglutination inhibiting antibody

(A) Neutralizing antibody throughout 1 year after vaccination. Data is represented by box-plot diagram with a solid black line at median titers and a cross at geometric mean titers (GMT). Red line indicates conventional antibody level threshold (1:40). (B, C) Correlation of HI and MNA data in absolute titers and fold increase values, correspondingly. Each dot represents one participant. Results of Pearson correlation test applied to logarithmic values are presented on graphs. Dotted lines mark the conventional seroconversion threshold (4-fold increase).

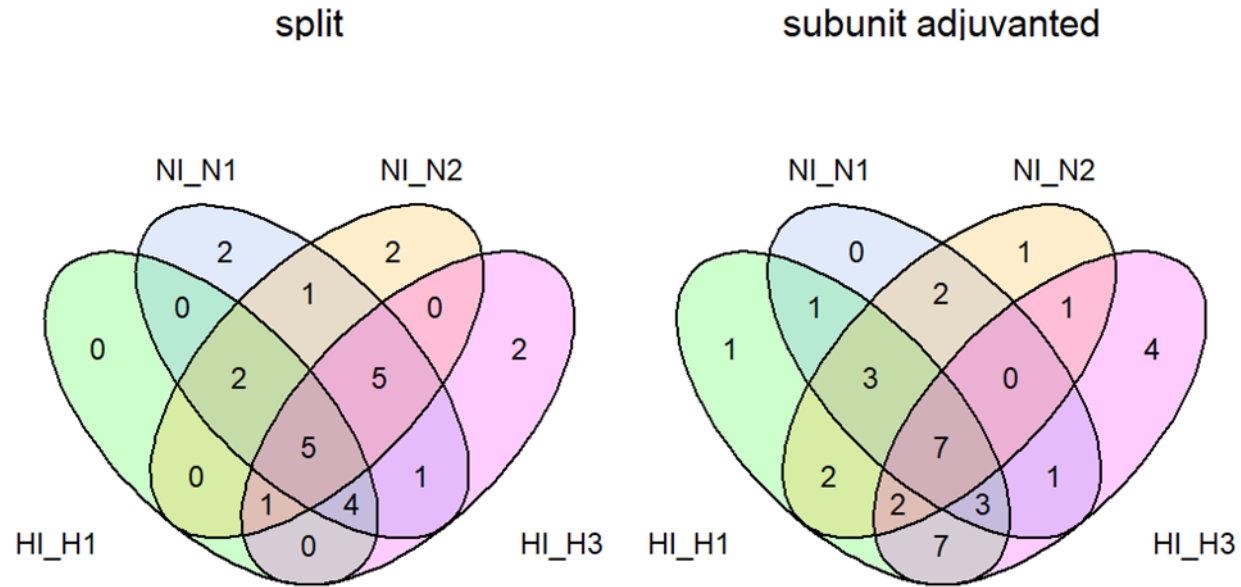

**Supplementary Figure S4.** Number for participants with seroconversion to all four vaccine components (H1-HA, N1-NA, H3-HA and N2-NA), and combinations, presented in Venn's diagram (number of non-responders to any component not presented).

## **Supplementary Methods**

### **Microneutralization assay**

Microneutralization assay (MNA) was performed as recommended by WHO [22] using live influenza viruses from the collection of the Smorodintsev Research Institute of Influenza. Sera were treated for 16-19 h at 37°C with receptor destroying enzyme (RDE) from *Vibrio cholerae* NA extract (Denka Seiken Co., Tokyo, Japan) and then heat-inactivated at 56 °C for 30 min. Each serum (tested in duplicate) was 2-fold serially diluted in 96-well U-bottom polymer plates starting from 1:10 and mixed with 100 TCID<sub>50</sub> of influenza virus. After 1 h incubation 100 ul of mixture were transferred to MDCK cells (#IRR, FR-58) in 96-well plate and incubated at 37C. After 3-days incubation cells were fixed with 80% acetone (Vekton, Rusia) and stained with HRP-conjugated anti-influenza NP monoclonal antibody 6D11 (produced in the Smorodintsev Research Institute of Influenza). TMB was added to develop colorimetric reaction and optical density at 450 nm was measured by Multiskan MS (Labsystems, Finland). Neutralizing antibody titer was calculated as the reciprocal of the last serum dilution with optical density less than a half of that in virus control wells. A four-fold increase in MNA antibody titer after vaccination was considered as antibody seroconversion.
